# Supplementary material
Source: MDPI journal article supplement (https://www.mdpi.com/2071-1050/13/7/3858)
Supplement: s1 [file s1]

**Attached 1: keywords chosen in relation to SG11 indicators**

| <b>Keywords</b>                             | <b>SDG11 indicators (ISTAT)</b>                                                               |
|---------------------------------------------|-----------------------------------------------------------------------------------------------|
| <i>"Structural problems"</i>                | Percentage of people in homes with structural problems or moisture problems                   |
| <i>"Moisture problems"</i>                  |                                                                                               |
| <i>"Overcrowded dwellings"</i>              | Percentage of people in overcrowded dwellings                                                 |
| <i>"Homes with noise problems"</i>          | Percentage of people in homes with noise problems from neighbours or the street               |
| <i>"Public transport"</i>                   | Families by level of difficulty in connecting to public transport in the area where they live |
|                                             | Students who routinely travel to the place of study by public transport only                  |
| <i>"Travel by private means"</i>            | People who routinely travel to the workplace by private means only                            |
| <i>"Soil consumption"</i>                   | Waterproofing and per capita soil consumption                                                 |
| <i>"Construction abuse"</i>                 | Construction Abuse                                                                            |
| <i>"Exposure to landslide risk"</i>         | Population exposed to landslide risk by region and by provincial capital city                 |
|                                             | Population exposed to landslide risk                                                          |
| <i>"Exposure to flood risk"</i>             | Population exposed to flood risk by region and by provincial capital city                     |
|                                             | Population exposed to flood risk                                                              |
| <i>"Deaths due to landslides"</i>           | Number of deaths and missing persons due to landslides                                        |
| <i>"Injured by landslides"</i>              | Number of injured by landslides                                                               |
| <i>"Deaths due to flooding"</i>             | Number of deaths and missing persons due to floods / flooding                                 |
| <i>"Injured by flooding"</i>                | Number of people injured by floods / flooding                                                 |
| <i>"Municipal waste"</i>                    | Municipal waste sent to landfill as a percentage of total municipal waste collected           |
| <i>"Exposure to air pollution by PM2.5"</i> | Urban population exposure to air pollution by particulate matter <2.5µm                       |
| <i>"Exposure to air pollution by PM10"</i>  | Urban population exposure to air pollution by particulate matter <10µm                        |
| <i>"Air quality PM10"</i>                   | Urban air quality - PM10                                                                      |
| <i>"Exceedances PM10"</i>                   | Exceedances of the daily limit value for PM10 in provincial capital cities                    |
| <i>"PM10 Average annual concentration"</i>  | PM10 Average annual concentration in provincial capital municipalities                        |
| <i>"PM2.5 Average annual concentration"</i> | PM2.5 Average annual concentration in provincial capital municipalities                       |

|                                                  |                                                                                                                                        |
|--------------------------------------------------|----------------------------------------------------------------------------------------------------------------------------------------|
| <i>"Air quality NO2"</i>                         | Urban air quality - Nitrogen dioxide                                                                                                   |
| <i>"NO2 Average annual concentration"</i>        | NO2 Average annual concentration in provincial capital municipalities                                                                  |
| <i>"OZONE daily number exceeding the target"</i> | OZONE daily number exceeding the target in the provincial capital municipalities                                                       |
| <i>"Temperature"</i>                             | Indices of temperature and precipitation extremes for provincial capitals                                                              |
| <i>"Precipitation"</i>                           |                                                                                                                                        |
| <i>"Temperature CLINO"</i>                       | Indices of temperature and precipitation extremes in the main provincial capitals/metropolitan cities. Climate value (CLINO) 1971-2000 |
| <i>"Precipitation CLINO"</i>                     |                                                                                                                                        |
| <i>"Urban green areas"</i>                       | Incidence of urban green areas on the urbanised surface of cities                                                                      |
| <i>"Sexual harassment"</i>                       | People aged 14-65 who have suffered at least one sexual harassment in the last 12 months                                               |

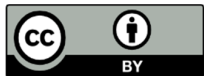

21 by the author. Licensee MDPI, Basel, Switzerland. This article is an open access article distributed under the terms and conditions of the Creative Commons Attribution (CC BY) license (<http://creativecommons.org/licenses/by/4.0/>).
